# Supplementary material
Source: PubMed Central journal article supplement (PMC4918844)
Supplement: 10.1194_M064709_jlr.M064709-1.pdf [file 10.1194_M064709_jlr.M064709-1.pdf]

**Cholesterol 7 $\alpha$ -hydroxylase-deficient mice are protected from high fat/high cholesterol diet-induced metabolic disorders**

Jessica M. Ferrell<sup>1</sup>, Shannon Boehme<sup>1</sup>, Feng Li<sup>2</sup> and John Y.L. Chiang<sup>1\*</sup>

<sup>1</sup>Department of Integrative Medical Sciences, Northeast Ohio Medical University, Rootstown, OH

<sup>2</sup>Department of Molecular and Cellular Biology, Baylor College of Medicine, Houston, TX

### Supplemental Fig. 1

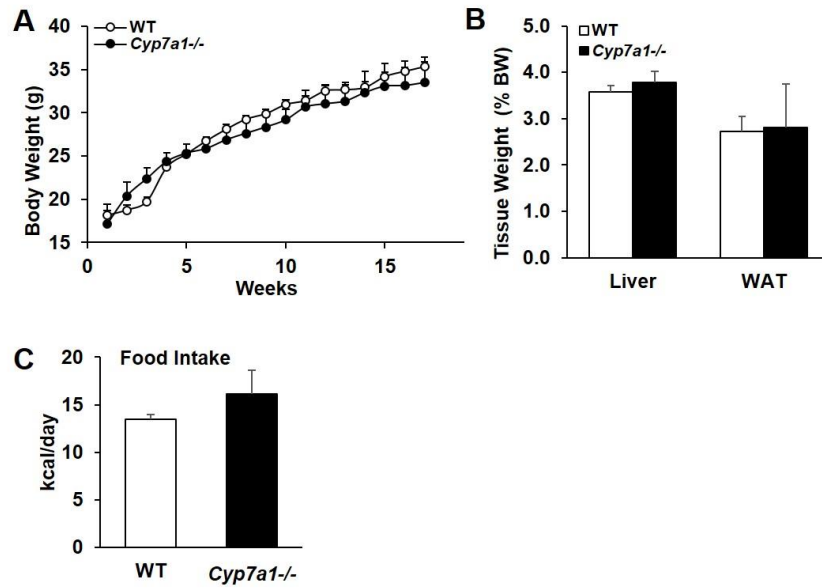

**Supplemental Fig. 1.** Physiological characteristics of *Cyp7a1*<sup>-/-</sup> mice maintained on chow diet. Male wild type and *Cyp7a1*<sup>-/-</sup> mice (n=5) were maintained on standard rodent chow diet until 23-26 weeks of age. **A.** Growth curve on chow diet, **B.** liver-to-body weight and white adipose-to-body weight ratios and **C.** daily average kcal intake were measured. White circle or bar (WT); black circle or bar (*Cyp7a1*<sup>-/-</sup>), data were analyzed by Student's *t*-test and 1-way ANOVA.

Supplemental Fig. 2

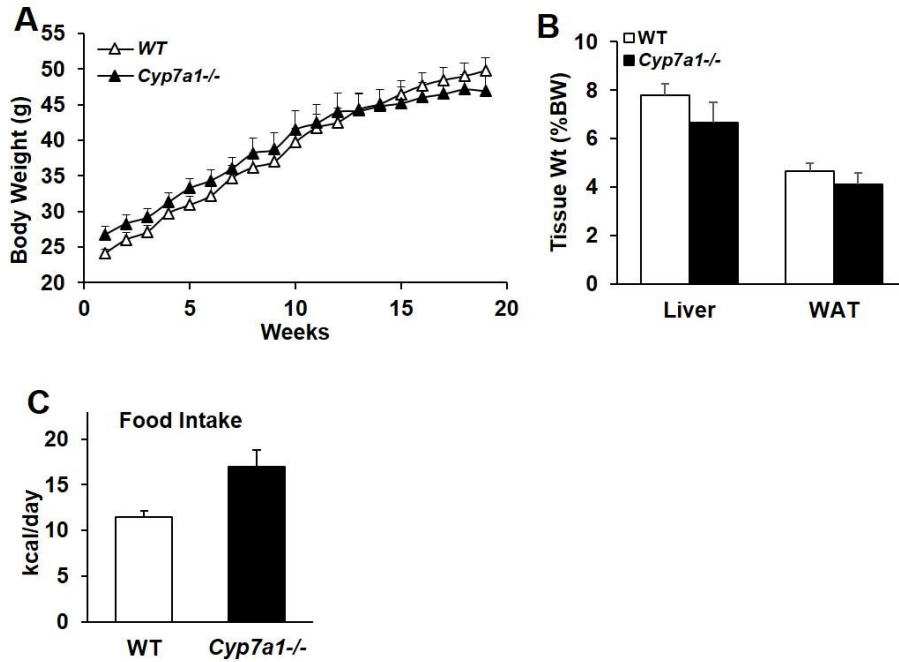

**Supplemental Fig. 2. Physiological characteristics of *Cyp7a1*<sup>-/-</sup> mice maintained on Western diet.** Male wild type and *Cyp7a1*<sup>-/-</sup> mice (n=6) were maintained on high fat, high cholesterol Western diet for 18 weeks. **A.** Growth curve on Western diet, **B.** liver-to-body weight and white adipose-to-body weight ratios and **C.** daily average food intake were measured. White triangle or bar (WT), black triangle or bar (*Cyp7a1*<sup>-/-</sup>), data were analyzed by Student's *t*-test and 1-way ANOVA, \*indicates  $p < 0.05$ .

Supplemental Fig. 3

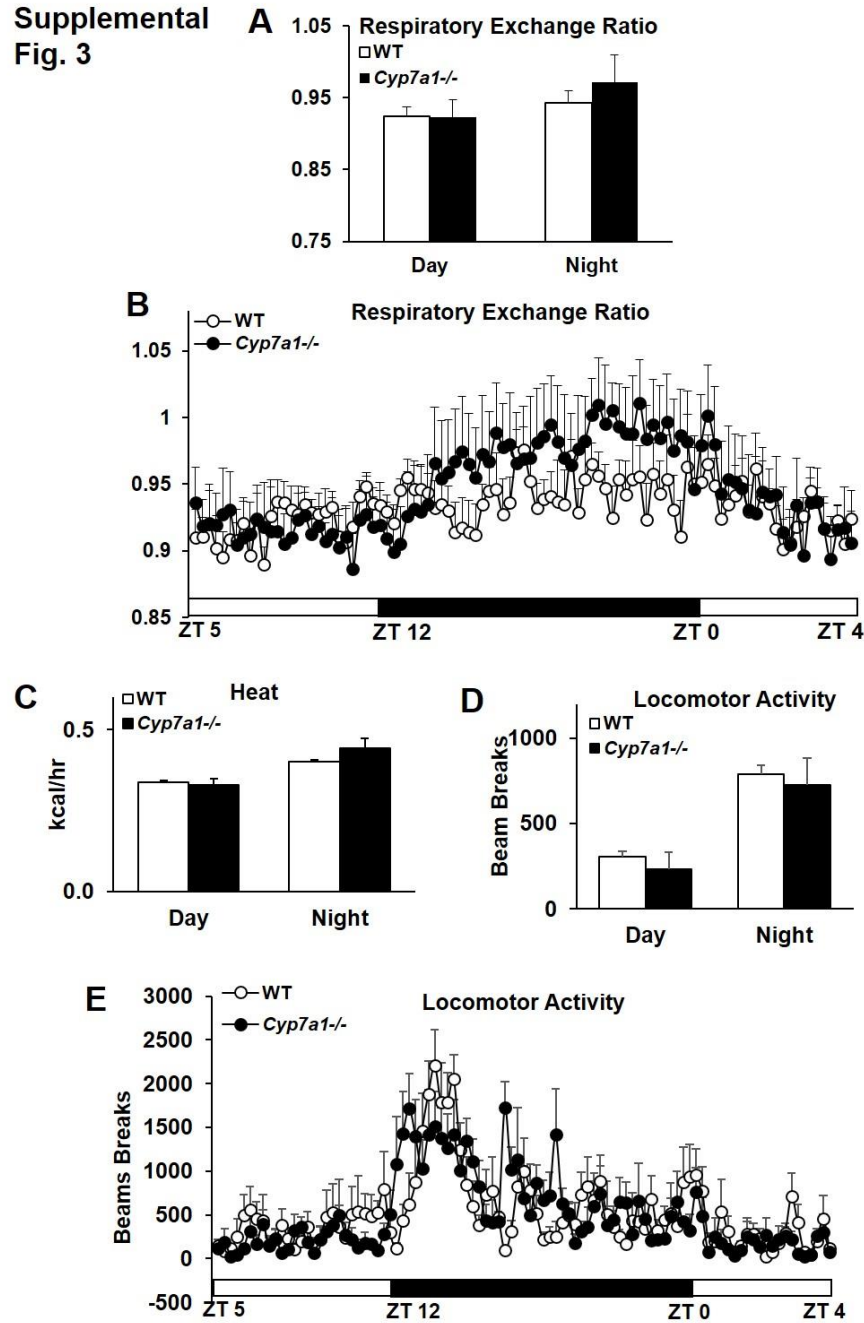

**Supplemental Fig. 3. *Cyp7a1*<sup>-/-</sup> mice exhibit metabolic physiology similar to normal wild type mice.**

Male wild type and *Cyp7a1*<sup>-/-</sup> mice (n=5) were maintained on standard rodent chow diet until 23-26 weeks of age. **A.** and **B.** respiratory exchange ratio (RER), **C.** heat production and **D.** and **E.** locomotor activity did not differ by genotype. White circle or bar (WT); black circle or bar (*Cyp7a1*<sup>-/-</sup>), data were analyzed by Student's *t*-test and 1-way ANOVA.

Supplemental Fig. 4

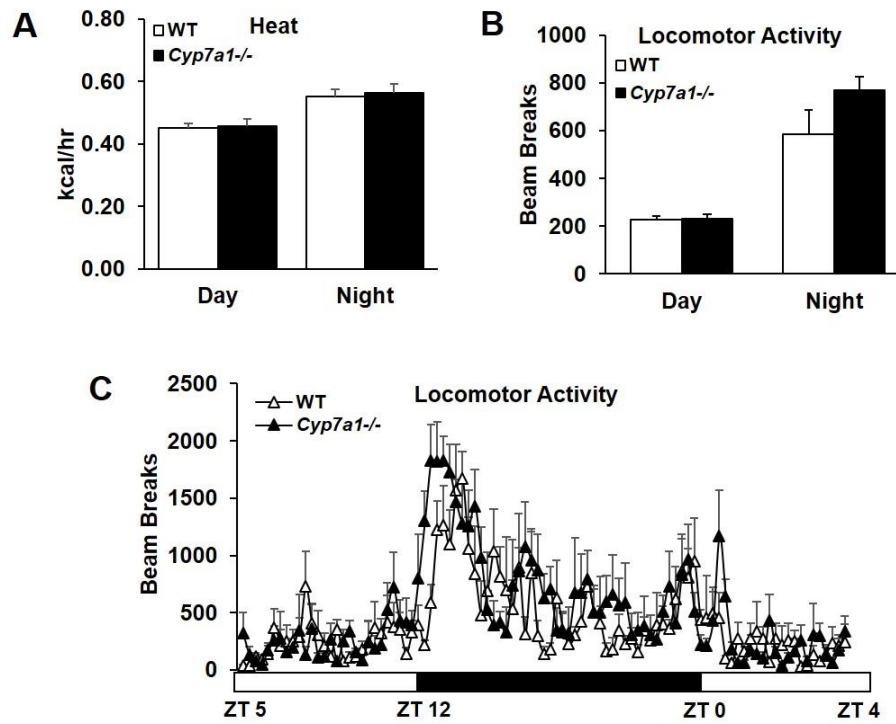

**Supplemental Fig. 4. Increased RER is not due to energy production or locomotor activity in *Cyp7a1*<sup>-/-</sup> mice maintained on Western diet.** Male wild type and *Cyp7a1*<sup>-/-</sup> mice (n=6) were maintained on high fat, high cholesterol Western diet for 18 weeks. **A.** heat production and **B.** and **C.** locomotor activity did not differ between genotype. White triangle or bar (WT); black triangle or bar (*Cyp7a1*<sup>-/-</sup>), data were analyzed by Student's *t*-test and 1-way ANOVA.

## Supplemental Fig. 5

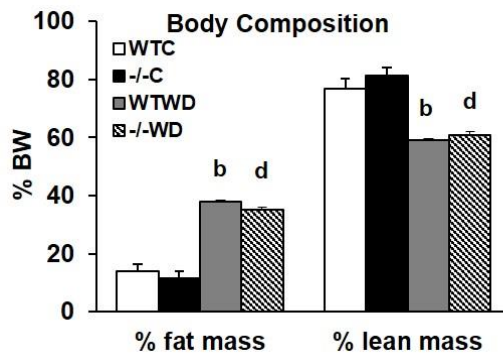

**Supplemental Fig. 5. *Cyp7a1*<sup>-/-</sup> mice have a similar body composition as wild type mice.** Male wild type and *Cyp7a1*<sup>-/-</sup> mice were maintained on normal chow diet (n=5) or Western diet for 18 weeks (n=6). Mice were analyzed by EchoMRI to determine body composition (fat and lean mass normalized to body weight). WTC (WT chow), -/-C (*Cyp7a1*<sup>-/-</sup> chow), WTWD (WT Western diet), -/-WD (*Cyp7a1*<sup>-/-</sup> Western diet), data were analyzed by 1-way ANOVA followed by posthoc Bonferroni-Holm test where appropriate, “a” indicates genotype effect (p<0.05) within chow diet, “b” indicates diet effect (p<0.05) within WT genotype, “c” indicates genotype effect (p<0.05) within Western diet, “d” indicates diet effect (p<0.05) within *Cyp7a1*<sup>-/-</sup> genotype.

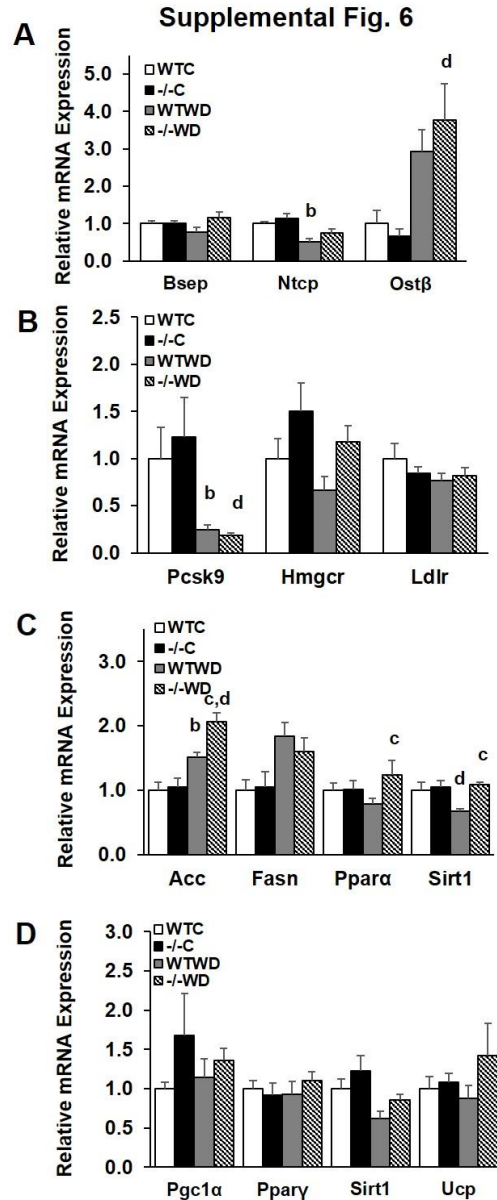

**Supplemental Fig. 6. Gene expression in *Cyp7a1*<sup>-/-</sup> liver and brown adipose tissue.** Male wild type and *Cyp7a1*<sup>-/-</sup> mice (n=5-6) were maintained on standard rodent chow diet or Western diet for 18 weeks. Relative mRNA expression of **A.** liver bile acid transport genes, **B.** liver cholesterol metabolism genes, **C.** liver lipid and energy metabolism genes and **D.** brown adipose metabolism genes. Data were analyzed by 1-way ANOVA followed by posthoc Bonferroni-Holm test where appropriate, “a” indicates genotype effect (p<0.05) within chow diet, “b” indicates diet effect (p<0.05) within WT genotype, “c” indicates genotype effect (p<0.05) within Western diet, “d” indicates diet effect (p<0.05) within *Cyp7a1*<sup>-/-</sup> genotype.
